# Supplementary material for: Expecting the unexpected: high pressure crystallization significantly boosts up triboelectric outputs of microbial polyesters
Source: Royal Society of Chemistry journal article supplement (doi:10.1039/d0ta11283f), 2021-01-01
Supplement: d0ta11283f1.pdf [file d0ta11283f1.pdf]

## Supporting Information

### **Expecting the unexpected: High pressure crystallization significantly boosts up triboelectric outputs of microbial polyesters**

Chuanfeng Wang<sup>1</sup>, Zhou Peng<sup>1</sup>, Xi Huang<sup>1</sup>, Cheng Yan<sup>1</sup>, Tao Yang<sup>1</sup>, Chaoliang Zhang<sup>3</sup>, Jun Lu<sup>1,2,#,\*</sup>, Weiqing Yang<sup>1,\*</sup>

<sup>1</sup> Key Laboratory of Advanced Technologies of Materials, Ministry of Education, School of Materials Science and Engineering, Southwest Jiaotong University, Chengdu 610031, Sichuan, China

<sup>2</sup> State Key Laboratory of Molecular Engineering of Polymers, Fudan University, Shanghai 200433, China

<sup>3</sup> State Key Laboratory of Oral Diseases, West China Hospital of Stomatology, Sichuan University, Chengdu 610041, Sichuan, China

# Other used names Jun Lv and Jun Lyu.

\* Corresponding authors.

E-mail: [junluprc@hotmail.com](mailto:junluprc@hotmail.com) (J. Lu), [wqyang@swjtu.edu.cn](mailto:wqyang@swjtu.edu.cn) (W.Q. Yang).

**The file includes:**

Measurements of bio-TENG device.

**Fig. S1** Open-circuit voltage **(a)** and short-circuit current **(b)** outputs of HP-PHB based TENG, generated at different frequencies and a given force of 4.5 N.

**Fig. S2** Open-circuit voltage **(a)** and short-circuit current **(b)** outputs of HP-PHB based TENG, generated at different frequencies and a given force of 10 N. **(c)** is the magnified view of the portion highlighted by an elliptical frame in **(b)**.

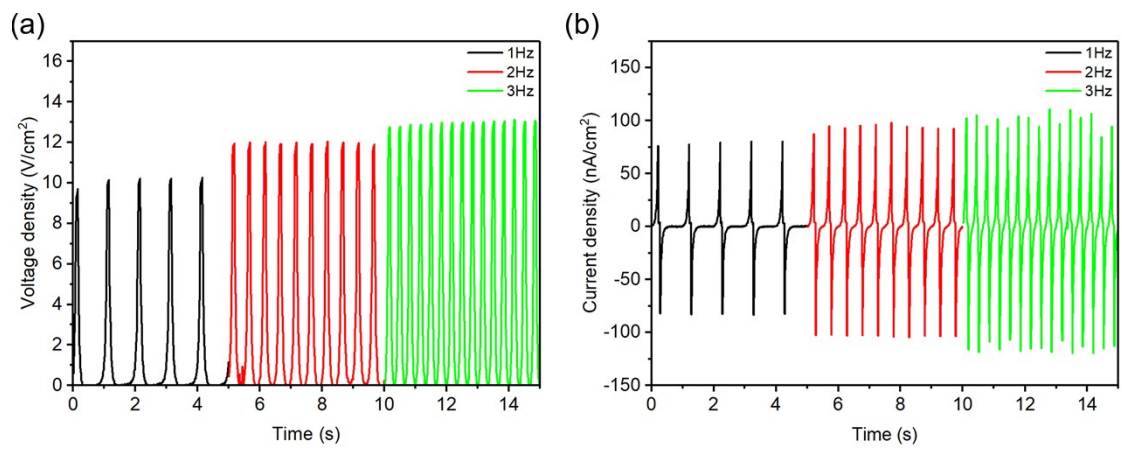

**Fig. S1** Open-circuit voltage **(a)** and short-circuit current **(b)** outputs of HP-PHB based TENG, generated at different frequencies and a given force of 4.5 N.

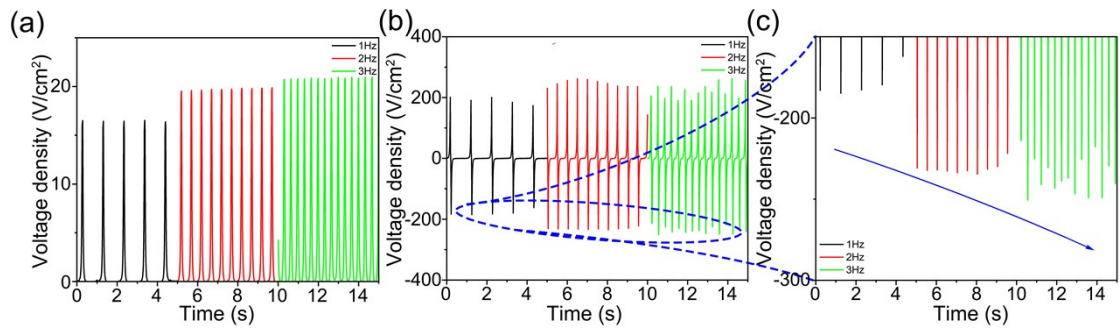

**Fig. S2** Open-circuit voltage **(a)** and short-circuit current **(b)** outputs of HP-PHB based TENG, generated at different frequencies and a given force of 10 N. **(c)** is the magnified view of the portion highlighted by an elliptical frame in **(b)**.
